# Supplementary material for: Land snail dispersal, abundance and diversity on green roofs
Source: PLoS One. 2019 Nov 14;14(11):e0221135. doi: 10.1371/journal.pone.0221135 (PMC6855472; doi:10.1371/journal.pone.0221135)
Supplement: S1 Table — (XLSX) [file pone.0221135.s001.xlsx]

## Sheet: Sheet1
S1 Table. Summary of all data associated with green roof surveys.
Building	City	Date Collected	Height at GR	Year GR Installed	Roof Area (sqft)	Roof/ground	Green roof type	Plant diversity	Dominant Vegetation	LatDD	LongDD	Live/Recent dead (some)	Genus	Species	n	Native	Greenhouse	Habitat/Ecology	Address
ASHRAE Headquarters	Atlanta	########	2nd floor	2008	n/a	Ground	n/a	Low	Grasses	33.834	-84.3297	n/a	n/a	n/a	n/a	Y			1791 Tullie Cir NE, Atlanta, GA 30329
Atlanta Botanical Gardens	Atlanta	########	2nd floor	2009	n/a	Ground	n/a	High	Trees, shrubs, grasses	33.7899	-84.3738	n/a	n/a	n/a	n/a	Y			1345 Piedmont Ave NE, Atlanta GA 30309
Cal Turner Family Center	Nashville	########	2nd floor	2014	n/a	Ground	n/a	Moderate	Grasses, shrubs	36.1664	-86.8096	Y	Gastrocopta	Gastrocopta contracta	1	Y	Y		1011 21st Ave N, Nashville, TN 37208
Cal Turner Family Center	Nashville	########	2nd floor	2014	n/a	Ground	n/a	Moderate	Grasses, shrubs	36.1664	-86.8096	N	Hawaiia	Hawaiia miniscula	1	Y	Y		1011 21st Ave N, Nashville, TN 37208
Cal Turner Family Center	Nashville	########	2nd floor	2014	n/a	Ground	n/a	Moderate	Grasses, shrubs	36.1664	-86.8096	N	Striatura	Striatura meridionalis	8	Y			1011 21st Ave N, Nashville, TN 37208
Cal Turner Family Center	Nashville	########	2nd floor	2014	n/a	Ground	n/a	Moderate	Grasses, shrubs	36.1664	-86.8096	N	Vallonia	Vallonia excentrica	2	Y			1011 21st Ave N, Nashville, TN 37208
Cal Turner Family Center	Nashville	########	2nd floor	2014	n/a	Ground	n/a	Moderate	Grasses, shrubs	36.1664	-86.8096	Y	Zonitoides	Zonitoides arboreus	2	Y	Y		1011 21st Ave N, Nashville, TN 37208
Chattahoochee Nature Center	Atlanta	########	2nd floor	2009	n/a	Ground	n/a	Low	Grasses	34.0044	-84.3827	n/a	n/a	n/a	n/a	Y			9135 Willeo Rd, Rosewell, GA 30075
Clemson University Restoration Institute	Charleston	########	3rd floor	2016	n/a	Ground	n/a	Low	Grasses	32.8566	-79.959	n/a	n/a	n/a	n/a	Y			1250 Supply St, North Charleston, SC 29405
Crash Pad	Chattanooga	########	2nd floor	2012	n/a	Ground	n/a	Low	Grasses, shrubs	35.036	-85.3048	n/a	n/a	n/a	n/a	Y			29 Johnson St, Chattanooga, TN 37408
Creative Museum	Chattanooga	########	3rd floor	2010	n/a	Ground	n/a	Moderate	Grasses	35.0526	-85.3122	Y	Pupoides	Pupoides albilabris	1	Y	Y		321 Chestnut St. Chattanooga, TN 37402
First TN Park	Nashville	########	2nd floor	2015	n/a	Ground	n/a	Low	Grasses	36.1722	-86.7846	n/a	n/a	n/a	n/a	Y			20 Junior Gilliam Way, Nashville TN 37203
Freeman Webb Building	Nashville	########	5th floor	2009	n/a	Ground	n/a	Low	Grasses, shrubs	36.108	-86.8201	Y	Glyphyalinia	Glyphyalinia indentata	4	Y	Y		3818-3817 Bedford Ave, Nashville, TN 37215
Freeman Webb Building	Nashville	########	5th floor	2009	n/a	Ground	n/a	Low	Grasses, shrubs	36.108	-86.8201	N	Hawaiia	Hawaiia miniscula	2	Y	Y		3818-3817 Bedford Ave, Nashville, TN 37215
Freeman Webb Building	Nashville	########	5th floor	2009	n/a	Ground	n/a	Low	Grasses, shrubs	36.108	-86.8201	N	Inflectarius	Inflectarius rugeli	1	Y			3818-3817 Bedford Ave, Nashville, TN 37215
Freeman Webb Building	Nashville	########	5th floor	2009	n/a	Ground	n/a	Low	Grasses, shrubs	36.108	-86.8201	Y	Opeas	Opeas pyrgula	16	Ex	Y		3818-3817 Bedford Ave, Nashville, TN 37215
Freeman Webb Building	Nashville	########	5th floor	2009	n/a	Ground	n/a	Low	Grasses, shrubs	36.108	-86.8201	Y	Polygyra	Polygyra cereolus	2	ExL	Y		3818-3817 Bedford Ave, Nashville, TN 37215
Freeman Webb Building	Nashville	########	5th floor	2009	n/a	Ground	n/a	Low	Grasses, shrubs	36.108	-86.8201	N	Pupoides	Pupoides albilabris	1	Y	Y		3818-3817 Bedford Ave, Nashville, TN 37215
Freeman Webb Building	Nashville	########	5th floor	2009	n/a	Ground	n/a	Low	Grasses, shrubs	36.108	-86.8201	Y	Rabdotus	Rabdotus dealbatus	2	Y			3818-3817 Bedford Ave, Nashville, TN 37215
Freeman Webb Building	Nashville	########	5th floor	2009	n/a	Ground	n/a	Low	Grasses, shrubs	36.108	-86.8201	Y	Triodopsis	Triodopsis tridentata	3	Y			3818-3817 Bedford Ave, Nashville, TN 37215
Freeman Webb Building	Nashville	########	5th floor	2009	n/a	Ground	n/a	Low	Grasses, shrubs	36.108	-86.8201	Y	Zonitoides	Zonitoides arboreus	8	Y	Y		3818-3817 Bedford Ave, Nashville, TN 37215
Georgia Southern Uni, Learning Commons	Savannah	########	2nd floor	2013	n/a	Ground	n/a	Low	Grasses	31.9791	-81.1609	n/a	n/a	n/a	n/a	Y			Library Dr, Savannah, GA 31419
Gibbs Highschool	Knoxville	########	below 2nd floor	2010	n/a	Ground	n/a	Low	Grasses	36.1303	-83.8521	n/a	n/a	n/a	n/a	Y			7628 Tazewell Pike, Corryton, TN, 37721
Hamilton County Health Center	Chattanooga	########	2nd floor	2011	n/a	Ground	n/a	Low	Shrubs	35.0487	-85.2924	n/a	n/a	n/a	n/a	Y			921 E 3rd St, Chattanooga, TN 37403
Homewood Suites- 3rd Floor	Savannah	########	3rd floor	2015	n/a	Ground	n/a	Moderate	Grasses	32.0789	-81.083	n/a	n/a	n/a	n/a	Y			611 East River St, Savannah, GA 31401
Low Country Local First	Charleston	########	2nd floor	2014	n/a	Ground	n/a	Low	Grasses	32.8218	-79.9509	n/a	n/a	n/a	n/a	Y			1630-2 Meeting St, Charleston, SC 29405
Mary Walker	Chattanooga	########	2nd floor	2011	n/a	Ground	n/a	Low	Grasses, shrubs	35.0262	-85.3117	N	Triodopsis	Triodopsis tridentata	1	Y			2505 S Market St, Chattanooga, TN 37408
Mary Walker	Chattanooga	########	2nd floor	2011	n/a	Ground	n/a	Low	Grasses, shrubs	35.0262	-85.3117	Y	Zonitoides	Zonitoides arboreus	3	Y	Y		2505 S Market St, Chattanooga, TN 37408
McCabe Community Center	Nashville	########	2nd floor	2011	n/a	Ground	n/a	Moderate	Grasses, shrubs	36.1415	-86.842	N	Gastrocopta	Gastrocopta armifera	2	Y	Y		101 46th Ave N, Nashville, TN 37209
McCabe Community Center	Nashville	########	2nd floor	2011	n/a	Ground	n/a	Moderate	Grasses, shrubs	36.1415	-86.842	Y	Lucilla	Lucilla scintilla	6	Y			101 46th Ave N, Nashville, TN 37209
McCabe Community Center	Nashville	########	2nd floor	2011	n/a	Ground	n/a	Moderate	Grasses, shrubs	36.1415	-86.842	N	Polygyra	Polygyra cereolus	2	ExL	Y		101 46th Ave N, Nashville, TN 37209
McCabe Community Center	Nashville	########	2nd floor	2011	n/a	Ground	n/a	Moderate	Grasses, shrubs	36.1415	-86.842	N	Pupoides	Pupoides albilabris	1	Y	Y		101 46th Ave N, Nashville, TN 37209
McCabe Community Center	Nashville	########	2nd floor	2011	n/a	Ground	n/a	Moderate	Grasses, shrubs	36.1415	-86.842	Y	Triodopsis	Triodopsis vulgata	5	Y			101 46th Ave N, Nashville, TN 37209
McCabe Community Center	Nashville	########	2nd floor	2011	n/a	Ground	n/a	Moderate	Grasses, shrubs	36.1415	-86.842	Y	Zonitoides	Zonitoides arboreus	17	Y	Y		101 46th Ave N, Nashville, TN 37209
Mt. Pleasant MUSC East Cooper Hospital	Charleston	########	3rd floor	2011	n/a	Ground	n/a	Low	Grasses	32.8177	-79.8405	n/a	n/a	n/a	n/a	Y			1600 Midtown Ave, Mt Pleasant, SC 29464
Music City Center	Nashville	########	6th floor	2012	n/a	Ground	n/a	Low	None	36.1576	-86.7772	n/a	n/a	n/a	n/a	Y			201 5th Ave S, Nashville, TN 37203
Saul Nurseries "The Swamp"	Atlanta	########	below 2nd floor	2002	n/a	Ground	n/a	Moderate	Grasses, shrubs	33.8948	-84.3508	n/a	n/a	n/a	n/a	Y			1115 Curry Dr, Atlanta GA 30319
Sevier Park Community Center	Nashville	########	2nd floor	2014	n/a	Ground	n/a	Low	Grasses	36.1178	-86.7873	Y	Zonitoides	Zonitoides arboreus	16	Y	Y		1032-1198 Clayton Ave, Nashville, TN 37204
Shelby Bottoms	Nashville	########	2nd floor	2008	n/a	Ground	n/a	Moderate	Grasses, shrubs	36.1651	-86.7337	N	Carychium	Carychium exile	1	Y			1900 Davidson St. Nashville, TN 37206
Shelby Bottoms	Nashville	########	2nd floor	2008	n/a	Ground	n/a	Moderate	Grasses, shrubs	36.1651	-86.7337	Y	Succinea	Succinea sp.	3	?			1900 Davidson St. Nashville, TN 37206
Sky Garden	Charleston	########	8th floor	2010	n/a	Ground	n/a	Low	Grasses	32.7926	-79.9395	n/a	n/a	n/a	n/a	Y			28 Woolfe St, Charleston, SC 29403
Southface Energy Institute	Atlanta	########	2nd floor	2008	n/a	Ground	n/a	Moderate	Grasses	33.7673	-84.3806	N	Triodopsis	Triodopsis hopetenensis	1	Y	Y		241 Pine St NE, Atlanta, GA 30308
Southface Energy Institute	Atlanta	########	2nd floor	2008	n/a	Ground	n/a	Moderate	Grasses	33.7673	-84.3806	Y	Ventridens	Ventridens demissus	17	Y	Y		241 Pine St NE, Atlanta, GA 30308
University of GA, Geog/ Geol Bldg.	Athens	########	3rd floor	1965	n/a	Ground	n/a	Moderate	Grasses, shrubs	33.9487	-83.3756	n/a	n/a	n/a	n/a	Y			210 Field St #204, Athens, GA 30602
Zoo Atlanta	Atlanta	########	2nd floor	1996	n/a	Ground	n/a	High	Grasses, shrubs	33.734	-84.3733	Y	Glyphyalinia	Glyphyalinia indentata	2	Y	Y		800 Cherokee Ave SE, Atlanta, GA 30315
Zoo Atlanta	Atlanta	########	2nd floor	1996	n/a	Ground	n/a	High	Grasses, shrubs	33.734	-84.3733	Y	Hawaiia	Hawaiia miniscula	1	Y	Y		800 Cherokee Ave SE, Atlanta, GA 30315
Zoo Atlanta	Atlanta	########	2nd floor	1996	n/a	Ground	n/a	High	Grasses, shrubs	33.734	-84.3733	Y	Ventridens	Ventridens demissus	8	Y	Y		800 Cherokee Ave SE, Atlanta, GA 30315
ASHRAE Headquarters	Atlanta	########	2nd floor	2008	1800	Roof	Extensive	Low	Sedum, mosses	33.834	-84.3297	n/a	n/a	n/a	n/a	Y			1791 Tullie Cir NE, Atlanta, GA 30329
Atlanta Botanical Gardens	Atlanta	########	3rd floor	2009	4500	Roof	Intensive	High	Trees, shrubs, grasses	33.7899	-84.3738	N	Lucilla	Lucilla scintilla	1	Y		Open grassy areas	1345 Piedmont Ave NE, Atlanta GA 30309
Atlanta Botanical Gardens	Atlanta	########	2nd floor	2009	4500	Roof	Intensive	High	Trees, shrubs, grasses	33.7899	-84.3738	Y	Ventridens	Ventridens demissus	4	Y	Y	Generalist, urban	1345 Piedmont Ave NE, Atlanta GA 30309
Atlanta Botanical Gardens	Atlanta	########	2nd floor	2009	4500	Roof	Intensive	High	Trees, shrubs, grasses	33.7899	-84.3738	Y	Gastrocopta	Gastrocopta armifera	1	Y	Y	Sunny, open areas, urban	1345 Piedmont Ave NE, Atlanta GA 30309
Atlanta Botanical Gardens (Side Bldg.)	Atlanta	########	below 2nd floor	2009	500	Roof	Intensive	High	Trees, shrubs, grasses	33.7899	-84.3738	N	Opeas	Opeas pyrgula	1	Ex	Y	Open disturbed urban	1345 Piedmont Ave NE, Atlanta GA 30309
Atlanta Botanical Gardens (Side Bldg.)	Atlanta	########	below 2nd floor	2009	500	Roof	Intensive	High	Trees, shrubs, grasses	33.7899	-84.3738	Y	Zonitoides	Zonitoides arboreus	4	Y	Y	Generalist, v. widespread	1345 Piedmont Ave NE, Atlanta GA 30309
Cal Turner Family Center	Nashville	########	2nd floor	2014	14600	Roof	Extensive	Moderate	Sedum, grasses	36.1664	-86.8096	N	Gastrocopta	Gastrocopta contracta	1	Y	Y	Generalist, many habitats	1011 21st Ave N, Nashville, TN 37208
Cal Turner Family Center	Nashville	########	2nd floor	2014	14600	Roof	Extensive	Moderate	Sedum, grasses	36.1664	-86.8096	N	Pupoides	Pupoides albilabris	2	Y	Y	Glades, urban, bare ground	1011 21st Ave N, Nashville, TN 37208
Chattahoochee Nature Center	Atlanta	########	2nd floor	2009	2000	Roof	Extensive	Low	Grasses, prickly pear	34.0044	-84.3827	Y	Triodopsis	Triodopsis tridentata	5	Y		Generalist, disturbed urban	9135 Willeo Rd, Rosewell, GA 30075
Clemson University Restoration Institute	Charleston	########	3rd floor	2016	2560	Roof	Extensive	Low	Sedum, grasses, dandelions, Oxalis stricta, peppers	32.8566	-79.959	Y	Succinea	Succinea sp.	3	?	Y	Amphibious, greenhouse	1250 Supply St, North Charleston, SC 29405
Clemson University Restoration Institute	Charleston	########	3rd floor	2016	2560	Roof	Extensive	Low	Sedum, grasses, dandelions, Oxalis stricta, peppers	32.8566	-79.959	Y	Zonitoides	Zonitoides arboreus	94	Y	Y	Generalist, v. widespread	1250 Supply St, North Charleston, SC 29405
Crash Pad	Chattanooga	########	2nd floor	2012	3000	Roof	Extensive	Moderate	Sedum, grasses, onion	35.036	-85.3048	n/a	n/a	n/a	n/a	Y			29 Johnson St, Chattanooga, TN 37408
Creative Museum	Chattanooga	########	2nd floor	2010	3802	Roof	Extensive	High	Grasses, flowers, shrubs	35.0526	-85.3122	N	Triodopsis	Triodopsis tridentata	3	Y		Generalist, disturbed urban	321 Chestnut St. Chattanooga, TN 37402
Creative Museum	Chattanooga	########	2nd floor	2010	3802	Roof	Extensive	High	Grasses, flowers, shrubs	35.0526	-85.3122	N	Vallonia	Vallonia excentrica	2	Y		Grassy meadows, urban	321 Chestnut St. Chattanooga, TN 37402
Creative Museum	Chattanooga	########	2nd floor	2010	3802	Roof	Extensive	High	Grasses, flowers, shrubs	35.0526	-85.3122	Y	Polygyra	Polygyra cereolus	1	ExL	Y	Disturbed areas, gardens	321 Chestnut St. Chattanooga, TN 37402
Creative Museum	Chattanooga	########	2nd floor	2010	3802	Roof	Extensive	High	Grasses, flowers, shrubs	35.0526	-85.3122	Y	Pupoides	Pupoides albilabris	1	Y	Y	Glades, urban, bare ground	321 Chestnut St. Chattanooga, TN 37402
Creative Museum	Chattanooga	########	2nd floor	2010	3802	Roof	Extensive	High	Grasses, flowers, shrubs	35.0526	-85.3122	Y	Succinea	Succinea sp.	1	?	Y	Amphibious, greenhouse	321 Chestnut St. Chattanooga, TN 37402
Creative Museum	Chattanooga	########	2nd floor	2010	3802	Roof	Extensive	High	Grasses, flowers, shrubs	35.0526	-85.3122	Y	Gastrocopta	Gastrocopta armifera	2	Y	Y	Sunny, open areas, urban	321 Chestnut St. Chattanooga, TN 37402
Creative Museum	Chattanooga	########	2nd floor	2010	3802	Roof	Extensive	High	Grasses, flowers, shrubs	35.0526	-85.3122	Y	Lucilla	Lucilla scintilla	2	Y		Open grassy areas	321 Chestnut St. Chattanooga, TN 37402
Creative Museum	Chattanooga	########	3rd floor	2010	3802	Roof	Extensive	High	Grasses, flowers, shrubs	35.0526	-85.3122	N	Succinea	Succinea sp.	1	?	Y	Amphibious, greenhouse	321 Chestnut St. Chattanooga, TN 37402
Creative Museum	Chattanooga	########	3rd floor	2010	3802	Roof	Extensive	High	Grasses, flowers, shrubs	35.0526	-85.3122	N	Zonitoides	Zonitoides arboreus	3	Y	Y	Generalist, v. widespread	321 Chestnut St. Chattanooga, TN 37402
Creative Museum	Chattanooga	########	3rd floor	2010	3802	Roof	Extensive	High	Grasses, flowers, shrubs	35.0526	-85.3122	Y	Vallonia	Vallonia excentrica	10	Y		Grassy meadows, urban	321 Chestnut St. Chattanooga, TN 37402
First TN Park	Nashville	########	2nd floor	2015	1500	Roof	Extensive	Low	Sedum	36.1722	-86.7846	n/a	n/a	n/a	n/a	Y			19 Junior Gilliam Way, Nashville TN 37203
Freeman Webb Building	Nashville	########	5th floor	2009	52272	Roof	Extensive	Moderate	Sedum, grasses, Vinca minor	36.108	-86.8201	N	Gastrocopta	Gastrocopta procera	1	Y	Y	Dry open ground	3818-3817 Bedford Ave, Nashville, TN 37215
Freeman Webb Building	Nashville	########	5th floor	2009	52272	Roof	Extensive	Moderate	Sedum, grasses, Vinca minor	36.108	-86.8201	N	Succinea	Succinea sp.	2	?	Y	Amphibious, greenhouse	3818-3817 Bedford Ave, Nashville, TN 37215
Freeman Webb Building	Nashville	########	5th floor	2009	52272	Roof	Extensive	Moderate	Sedum, grasses, Vinca minor	36.108	-86.8201	N	Ventridens	Ventridens demissus	3	Y	Y	Generalist, urban	3818-3817 Bedford Ave, Nashville, TN 37215
Freeman Webb Building	Nashville	########	5th floor	2009	52272	Roof	Extensive	Moderate	Sedum, grasses, Vinca minor	36.108	-86.8201	N	Zonitoides	Zonitoides arboreus	1	Y	Y	Generalist, v. widespread	3818-3817 Bedford Ave, Nashville, TN 37215
Freeman Webb Building	Nashville	########	5th floor	2009	52272	Roof	Extensive	Moderate	Sedum, grasses, Vinca minor	36.108	-86.8201	Y	Opeas	Opeas pyrgula	1	Ex	Y	Open disturbed urban	3818-3817 Bedford Ave, Nashville, TN 37215
Freeman Webb Building	Nashville	########	5th floor	2009	52272	Roof	Extensive	Moderate	Sedum, grasses, Vinca minor	36.108	-86.8201	Y	Polygyra	Polygyra cereolus	8	ExL	Y	Disturbed areas, gardens	3818-3817 Bedford Ave, Nashville, TN 37215
Freeman Webb Building	Nashville	########	5th floor	2009	52272	Roof	Extensive	Moderate	Sedum, grasses, Vinca minor	36.108	-86.8201	Y	Patera	Patera appressa	5	Y	Y	Open disturbed urban	3818-3817 Bedford Ave, Nashville, TN 37215
Freeman Webb Building	Nashville	########	5th floor	2009	52272	Roof	Extensive	Moderate	Sedum, grasses, Vinca minor	36.108	-86.8201	Y	Rabdotus	Rabdotus dealbatus	4	Y		Open glades, meadows	3818-3817 Bedford Ave, Nashville, TN 37215
Freeman Webb Building	Nashville	########	5th floor	2009	52272	Roof	Extensive	Moderate	Sedum, grasses, Vinca minor	36.108	-86.8201	Y	Triodopsis	Triodopsis tridentata	4	Y		Generalist, disturbed urban	3818-3817 Bedford Ave, Nashville, TN 37215
Georgia Southern Uni, Learning Commons	Savannah	########	2nd floor	2013	500	Roof	Extensive	Moderate	Sedum, grasses	31.9791	-81.1609	N	Succinea	Succinea sp.	2	?	Y	Amphibious, greenhouse	Library Dr, Savannah, GA 31419
Georgia Southern Uni, Learning Commons	Savannah	########	2nd floor	2013	500	Roof	Extensive	Moderate	Sedum, grasses	31.9791	-81.1609	N	Zonitoides	Zonitoides arboreus	13	Y	Y	Generalist, v. widespread	Library Dr, Savannah, GA 31419
Gibbs Highschool	Knoxville	########	below 2nd floor	2010	200	Roof	Extensive	Low	Sedum	36.1303	-83.8521	n/a	n/a	n/a	n/a	Y			7628 Tazewell Pike, Corryton, TN, 37721
Hamilton County Health Center	Chattanooga	########	2nd floor	2011	5400	Roof	Extensive	Moderate	Sedum	35.0487	-85.2924	n/a	n/a	n/a	n/a	Y			921 E 3rd St, Chattanooga, TN 37403
Homewood Suites- 3rd Floor	Savannah	########	3rd floor	2015	1000	Roof	Extensive	Moderate	Grasses, herbs, flowers	32.0789	-81.083	Y	Polygyra	Polygyra cereolus	14	ExL	Y	Disturbed areas, gardens	611 East River St, Savannah, GA 31401
Homewood Suites- 8th Floor	Savannah	########	8th floor	2015	1000	Roof	Extensive	Moderate	Grasses, herbs, flowers	32.0789	-81.083	N	Zonitoides	Zonitoides arboreus	2	Y	Y	Generalist, v. widespread	611 East River St, Savannah, GA 31401
Homewood Suites- 8th Floor	Savannah	########	8th floor	2015	1000	Roof	Extensive	Moderate	Grasses, herbs, flowers	32.0789	-81.083	Y	Polygyra	Polygyra cereolus	18	ExL	Y	Disturbed areas, gardens	611 East River St, Savannah, GA 31401
Homewood Suites- 8th Floor	Savannah	########	8th floor	2015	1000	Roof	Extensive	Moderate	Grasses, herbs, flowers	32.0789	-81.083	Y	Succinea	Succinea sp.	2	?	Y	Amphibious, greenhouse	611 East River St, Savannah, GA 31401
Low Country Local First	Charleston	########	2nd floor	2014	2300	Roof	Extensive	Moderate	Sedum, grasses, Euphorbia nutans, Aster sp., Solidago altissma, prickly pear, wild onion, pine	32.8218	-79.9509	N	Pupoides	Pupoides albilabris	2	Y	Y	Glades, urban, bare ground	1630-2 Meeting St, Charleston, SC 29405
Low Country Local First	Charleston	########	2nd floor	2014	2300	Roof	Extensive	Moderate	Sedum, grasses, Euphorbia nutans, Aster sp., Solidago altissma, prickly pear, wild onion, pine	32.8218	-79.9509	Y	Gastrocopta	Gastrocopta procera	4	Y	Y	Dry open ground	1630-2 Meeting St, Charleston, SC 29405
Low Country Local First	Charleston	########	2nd floor	2014	2300	Roof	Extensive	Moderate	Sedum, grasses, Euphorbia nutans, Aster sp., Solidago altissma, prickly pear, wild onion, pine	32.8218	-79.9509	Y	Polygyra	Polygyra cereolus	18	ExL	Y	Disturbed areas, gardens	1630-2 Meeting St, Charleston, SC 29405
Mary Walker	Chattanooga	########	2nd floor	2011	2200	Roof	Extensive	Moderate	Sedum, grasses	35.0262	-85.3117	N	Gastrocopta	Gastrocopta armifera	1	Y	Y	Sunny, open areas, urban	2505 S Market St, Chattanooga, TN 37408
Mary Walker	Chattanooga	########	2nd floor	2011	2200	Roof	Extensive	Moderate	Sedum, grasses	35.0262	-85.3117	N	Patera	Patera appressa	1	Y	Y	Open disturbed urban	2505 S Market St, Chattanooga, TN 37408
Mary Walker	Chattanooga	########	2nd floor	2011	2200	Roof	Extensive	Moderate	Sedum, grasses	35.0262	-85.3117	Y	Pupoides	Pupoides albilabris	13	Y	Y	Glades, urban, bare ground	2505 S Market St, Chattanooga, TN 37408
McCabe Community Center	Nashville	########	2nd floor	2011	2750	Roof	Extensive	Moderate	Sedum, dandelions	36.1415	-86.842	Y	Bradybaena	Bradybaena similaris	17	Ex	Y	Grassy, humid (greenhouses)	101 46th Ave N, Nashville, TN 37209
McCabe Community Center	Nashville	########	2nd floor	2011	2750	Roof	Extensive	Moderate	Sedum, dandelions	36.1415	-86.842	N	Gastrocopta	Gastrocopta armifera	1	Y	Y	Sunny, open areas, urban	101 46th Ave N, Nashville, TN 37209
McCabe Community Center	Nashville	########	2nd floor	2011	2750	Roof	Extensive	Moderate	Sedum, dandelions	36.1415	-86.842	Y	Succinea	Succinea sp.	3	?	Y	Amphibious, greenhouse	101 46th Ave N, Nashville, TN 37209
McCabe Community Center	Nashville	########	2nd floor	2011	2750	Roof	Extensive	Moderate	Sedum, dandelions	36.1415	-86.842	Y	Zonitoides	Zonitoides arboreus	4	Y	Y	Generalist, v. widespread	101 46th Ave N, Nashville, TN 37209
McCabe Community Center	Nashville	########	2nd floor	2011	2750	Roof	Extensive	Moderate	Sedum, dandelions	36.1415	-86.842	Y	Polygyra	Polygyra cereolus	5	ExL	Y	Disturbed areas, gardens	101 46th Ave N, Nashville, TN 37209
McCabe Community Center	Nashville	########	2nd floor	2011	2750	Roof	Extensive	Moderate	Sedum, dandelions	36.1415	-86.842	Y	Pupoides	Pupoides albilabris	10	Y	Y	Glades, urban, bare ground	101 46th Ave N, Nashville, TN 37209
Mt. Pleasant MUSC East Cooper Hospital	Charleston	########	3rd floor	2011	700	Roof	Extensive	Low	Sedum	32.8177	-79.8405	N	Polygyra	Polygyra cereolus	7	ExL	Y	Disturbed areas, gardens	1600 Midtown Ave, Mt Pleasant, SC 29464
Music City Center	Nashville	########	6th floor	2012	191000	Roof	Extensive	Low	Sedum	36.1576	-86.7772	Y	Vallonia	Vallonia excentrica	1	Y		Grassy meadows, urban	201 5th Ave S, Nashville, TN 37203
Saul Nurseries "The Swamp"	Atlanta	########	below 2nd floor	2002	50	Roof	Extensive	Low	Sedum, prickly pear	33.8948	-84.3508	n/a	n/a	n/a	n/a	Y			1115 Curry Dr, Atlanta GA 30319
Sevier Park Community Center	Nashville	########	2nd floor	2014	2000	Roof	Extensive	Moderate	Sedum	36.1178	-86.7873	N	Pupoides	Pupoides albilabris	8	Y	Y	Glades, urban, bare ground	1032-1198 Clayton Ave, Nashville, TN 37204
Sevier Park Community Center	Nashville	########	2nd floor	2014	2000	Roof	Extensive	Moderate	Sedum	36.1178	-86.7873	Y	Triodopsis	Triodopsis tridentata	10	Y		Generalist, disturbed urban	1032-1198 Clayton Ave, Nashville, TN 37204
Sevier Park Community Center	Nashville	########	2nd floor	2014	2000	Roof	Extensive	Moderate	Sedum	36.1178	-86.7873	Y	Succinea	Succinea sp.	2	?	Y	Amphibious, greenhouse	1032-1198 Clayton Ave, Nashville, TN 37204
Shelby Bottoms	Nashville	########	2nd floor	2008	3200	Roof	Extensive	High	Sedum, grasses, prickly pear	36.1651	-86.7337	Y	Gastrocopta	Gastrocopta procera	2	Y	Y	Dry open ground	1900 Davidson St. Nashville, TN 37206
Shelby Bottoms	Nashville	########	2nd floor	2008	3200	Roof	Extensive	High	Sedum, grasses, prickly pear	36.1651	-86.7337	Y	Pupoides	Pupoides albilabris	28	Y	Y	Glades, urban, bare ground	1900 Davidson St. Nashville, TN 37206
Shelby Bottoms	Nashville	########	2nd floor	2008	3200	Roof	Extensive	High	Sedum, grasses, prickly pear	36.1651	-86.7337	Y	Gastrocopta	Gastrocopta armifera	4	Y	Y	Sunny, open areas, urban	1900 Davidson St. Nashville, TN 37206
Shelby Bottoms	Nashville	########	2nd floor	2008	3200	Roof	Extensive	High	Sedum, grasses, prickly pear	36.1651	-86.7337	Y	Polygyra	Polygyra cereolus	19	ExL	Y	Disturbed areas, gardens	1900 Davidson St. Nashville, TN 37206
Shelby Bottoms	Nashville	########	2nd floor	2008	3200	Roof	Extensive	High	Sedum, grasses, prickly pear	36.1651	-86.7337	Y	Pomatiopsis	Pomatiopsis lapidaria	3	Y		Moist soils, wetlands	1900 Davidson St. Nashville, TN 37206
Shelby Bottoms	Nashville	########	2nd floor	2008	3200	Roof	Extensive	High	Sedum, grasses, prickly pear	36.1651	-86.7337	Y	Succinea	Succinea sp.	45	?	Y	Amphibious, greenhouse	1900 Davidson St. Nashville, TN 37206
Shelby Bottoms	Nashville	########	2nd floor	2008	3200	Roof	Extensive	High	Sedum, grasses, prickly pear	36.1651	-86.7337	Y	Zonitoides	Zonitoides arboreus	4	Y	Y	Generalist, v. widespread	1900 Davidson St. Nashville, TN 37206
Sky Garden	Charleston	########	8th floor	2010	500	Roof	Extensive	Low	Grasses	32.7926	-79.9395	n/a	n/a	n/a	n/a	Y			28 Woolfe St, Charleston, SC 29403
Southface Energy Institute	Atlanta	########	2nd floor	2008	2000	Roof	Extensive	Low	Sedum	33.7673	-84.3806	Y	Ventridens	Ventridens demissus	2	Y	Y	Generalist, urban	241 Pine St NE, Atlanta, GA 30308
Southface Energy Institute	Atlanta	########	2nd floor	2008	2000	Roof	Extensive	Low	Sedum	33.7673	-84.3806	Y	Triodopsis	Triodopsis hopetenensis	8	Y	Y	Generalist, disturbed urban	241 Pine St NE, Atlanta, GA 30308
University of GA, Geog/ Geol Bldg.	Athens	########	3rd floor	1965	3000	Roof	Extensive	High	Shrubs, grasses, herbs	33.9487	-83.3756	Y	Lucilla	Lucilla inermis	1	Y		Open grassy areas	210 Field St #204, Athens, GA 30602
University of GA, Geog/ Geol Bldg.	Athens	########	3rd floor	1965	3000	Roof	Extensive	High	Shrubs, grasses, herbs	33.9487	-83.3756	Y	Zonitoides	Zonitoides arboreus	1	Y	Y	Generalist, v. widespread	210 Field St #204, Athens, GA 30602
University of GA, Geog/ Geol Bldg.	Athens	########	3rd floor	1965	3000	Roof	Extensive	High	Shrubs, grasses, herbs	33.9487	-83.3756	Y	Triodopsis	Triodopsis tridentata	5	Y		Generalist, disturbed urban	210 Field St #204, Athens, GA 30602
Zoo Atlanta	Atlanta	########	2nd floor	1996	16000	Roof	Intensive	High	Grasses, Yucca, Iva annua, pine	33.734	-84.3733	Y	Ventridens	Ventridens demissus	15	Y	Y	Generalist, urban	800 Cherokee Ave SE, Atlanta, GA 30315
