# Supplementary material for: Land snail dispersal, abundance and diversity on green roofs
Source: PLoS One. 2019 Nov 14;14(11):e0221135. doi: 10.1371/journal.pone.0221135 (PMC6855472; doi:10.1371/journal.pone.0221135)
Supplement: S2 Table — (XLSX) [file pone.0221135.s002.xlsx]

## Sheet: Sheet1
S2 Table. Diversity metrics for each survey site.
Site	Habitat	Richness	Abundance	D	H'	Evenness	Jaccards
ASHRAE Headquarters	Roof	0	0	-	-	-	-
	Ground	0	0	-	-	-	-
Atlanta Botanical Gardens	Roof	3	6	0.4	0.8676	0.789724	-
	Ground	0	0	-	-	-	-
Atlanta Botanical Gardens (side building)	Roof	2	5	0.676	0.5004	0.721925
	Ground	0	0	-	-	-	-
Cal Turner Family Center	Roof	2	3	0.6667	0.636514	0.918296	0.167
	Ground	5	14	0.6703	1.25276	0.778385	-
Chattahoochee Nature Center	Roof	1	5	1	0		-
	Ground	0	0	-	-	-	-
Clemson University Restoration Institute	Roof	2	97	0.0606	0.137953	0.199024	-
	Ground	0	0	-	-	-	-
Crash Pad	Roof	0	0	-	-	-	-
	Ground	0	0	-	-	-	-
Creative Museum	Roof	8	26	0.2308	1.698	0.816565	0.125
	Ground	1	1	1	0	-	-
First TN Park	Roof	0	0	-	-	-	-
	Ground	0	0	-	-	-	-
Freeman Webb Building	Roof	9	29	0.867	1.97229	0.897627	0.385
	Ground	9	39	0.7841	1.76621	0.803835	-
Georgia Southern Uni, Learning Commons	Roof	2	15	0.2476	0.392674	0.56651	-
	Ground	0	0	-	-	-	-
Gibbs Highschool	Roof	0	0	-	-	-	-
	Ground	0	0	-	-	-	-
Hamilton County Health Center	Roof	0	0	-	-	-	-
	Ground	0	0	-	-	-	-
Homewood Suites- 3rd Floor	Roof	1	14	1	0		-
	Ground	0	0	-	-	-	-
Homewood Suites- 8th Floor	Roof	3	22	0.3291	0.600166	0.546295	-
	Ground	0	0	-	-	-	-
Low Country Local First	Roof	3	24	0.4203	0.721464	0.656705	-
	Ground	0	0	-	-	-	-
Mary Walker	Roof	3	15	0.2571	0.485094	0.441552	0
	Ground	2	4	0.5	0.562335	0.811278	-
McCabe Community Center	Roof	6	40	0.7436	1.48691	0.829862	0.5
	Ground	6	33	0.6913	1.38333	0.772049
Mt. Pleasant MUSC East Cooper Hospital	Roof	1	7	1	0	-	-
	Ground	0	0	-	-	-	-
Music City Center	Roof	1	1	1	0	-	-
	Ground	0	0	-	-	-	-
Saul Nurseries "The Swamp"	Roof	0	0	-	-	-	-
	Ground	0	0	-	-	-	-
Sevier Park Community Center	Roof	3	20	0.6105	0.943348	0.858673	0
	Ground	1	16	1	0	-	-
Shelby Bottoms	Roof	7	105	0.7135	1.45093	0.74563	0.125
	Ground	2	4	0.5	0.562335	0.811278
Sky Garden	Roof	0	0	-	-	-	-
	Ground	0	0	-	-	-	-
Southface Energy Institute	Roof	2	10	0.3556	0.500402	0.721928	1
	Ground	2	18	0.1111	0.214559	0.309543	-
University of GA, Geog/ Geol Bldg.	Roof	3	7	0.5238	0.796312	0.724834	-
	Ground	0	0	-	-	-	-
Zoo Atlanta	Roof	1	15	1	0	-	0.333
	Ground	3	11	0.4727	0.759547	0.69137	-
